# Supplementary material
Source: Research Square preprint supplement (doi:10.21203/rs.3.rs-8999676/v1)
Supplement: Supplementary file 1 [file ed4c7d2281cba7c225d1a7ef.docx]

Supplementary material:

ITT-LOCF, for the calculated samples size of 40 per group, * statistically not significant. Differences between PP and ITT analyses may reflect imputation effects inherent to LOCF methodology, which may attenuate variance and influence significance estimates

Table 1s: Lipid Profile – ITT-LOCF (Follow-up Comparison)

| **Clinical Parameters (mg/dl)** | **Baseline (A) (N = 40)**  **(Mean** ± **SD)** | **Follow-up (A) (N = 40)**  **(Mean** ± **SD)** | **Baseline (B) (N = 40)**  **(Mean** ± **SD)** | **Follow-up (B) (N = 40)**  **(Mean** ± **SD)** | **p-value**  **(Follow-up (A)**  **v/s Follow-up (B))** |
| --- | --- | --- | --- | --- | --- |
| **Total Cholesterol** | 245.2 ± 9.8 | 200.1 ± 12.4 | 244.1 ± 8.7 | 189.4 ± 15.1 | < 0.001 |
| **HDL** | 31.0 ± 2.5 | 36.9 ± 3.4 | 31.2 ± 2.4 | 42.6 ± 4.1 | < 0.001 |
| **LDL** | 139.3 ± 3.4 | 88.8 ± 7.9 | 139.0 ± 3.0 | 78.9 ± 11.2 | < 0.001 |
| **VLDL** | 51.0 ± 4.3 | 38.0 ± 5.8 | 51.1 ± 4.4 | 38.7 ± 7.6 | 0.064* |
| **Triglycerides (TG)** | 142.0 ± 8.3 | 104.5 ± 12.6 | 142.2 ± 7.5 | 92.7 ± 15.4 | < 0.001 |

Table 2s: CRP – ITT-LOCF

| **CRP (mg/L)** | **Group-A (N = 40)**  **(Mean** ± **SD)** | **Group-B (N = 40)**  **(Mean** ± **SD)** | **p-value (Group-A v/s Group-B)** |
| --- | --- | --- | --- |
| Baseline | 37 ± 3.6 | 37 ± 2.4 | 0.748* |
| Follow-up | 19.4 ± 6.8 | 11.6 ± 11.2 | < 0.001 |
| p-value (Baseline v/s Follow-up) | < 0.0001 < 0.0001 | | |

Table 3s: MARS Score – ITT-LOCF

| **MARS** | **Group-A**  **(N = 40)** | **Group-B (N = 40)** | **p- value (Group-A v/s Group-B)** |
| --- | --- | --- | --- |
| **Baseline** | 4 ± 1.1 | 4 ± 1.0 | 0.900 |
| **Follow-up** | 6.7 ± 1.9 | 6.6 ± 2.3 | 0.82* |
| **p-value (Baseline v/s Follow-up)** | < 0.0001 < 0.0001 | | |

Table 4s: Quality of Life Domains – ITT-LOCF

| **Domains / Parameters** | **Follow-up (Group A)**  **(N = 37)** | **Follow-up (Group B)**  **(N = 35)** | **p-value** |
| --- | --- | --- | --- |
| **Physical Functioning** | 43.5 ± 4.9 | 47.5 ± 7.6 | 0.006* |
| **Role Limitations – Physical** | 55.2 ± 6.5 | 57.5 ± 8.9 | 0.018 |
| **Role Limitations – Emotional** | 58.2 ± 6.9 | 53.3 ± 6.8 | 0.015 |
| **Energy / Fatigue** | 51.0 ± 4.2 | 56.5 ± 3.0 | 0.05 |
| **Emotional Well-Being** | 49.4 ± 4.7 | 51.6 ± 6.3 | 0.07* |
| **Social Functioning** | 56.0 ± 4.3 | 58.4 ± 7.5 | 0.04 |
| **Pain** | 59.8 ± 4.6 | 61.6 ± 6.8 | 0.016 |
| **General Health** | 46.4 ± 3.7 | 49.6 ± 6.4 | 0.008 |
| **Health Change** | 48.7 ± 4.1 | 50.3 ± 6.9 | 0.21* |

**Patient screened and assessed**

**(N = 80)**

**Outcomes measure**

1. **Analyzed ITT: n = 40**
2. **Included in PP: n = 35**

**• Excluded from analysis (n = 0)**

1. **Analyzed ITT: n = 40**
2. **Included in PP: n = 37**

**• Excluded from analysis (n = 0)**

**Follow-up**

**Lost to follow-up (n = 5)**

**• Declined participation (n = 3)**

**• Lost to follow-up (n = 5)**

**Lost to follow-up (N = 3)**

**• Discontinued due to elevated blood pressure (n = 1)**

**• Lost to follow-up (n = 2)**

**Group B (N = 40)**

Atorvastatin 40 mg + Ezetimibe 10 mg

**Group A (N = 40)**

Atorvastatin 40 mg

**Interventions**

**Randomized (N = 80)**

Figure s : CONSORT 2010 flow diagram showing participant enrollment, randomization, follow-up, and analysis in the randomized controlled trial comparing atorvastatin monotherapy with atorvastatin plus ezetimibe in post-PCI patients. Analysis boxes show the number included in the intention-to-treat (ITT) population (equal to all randomized in each group), and below, the number included in the per-protocol (PP) set.
